# Supplementary material
Source: Research Square preprint supplement (doi:10.21203/rs.3.rs-9657102/v1)
Supplement: Supplementary file 1 [file ef690ef014f49dd58ca6322f.docx]

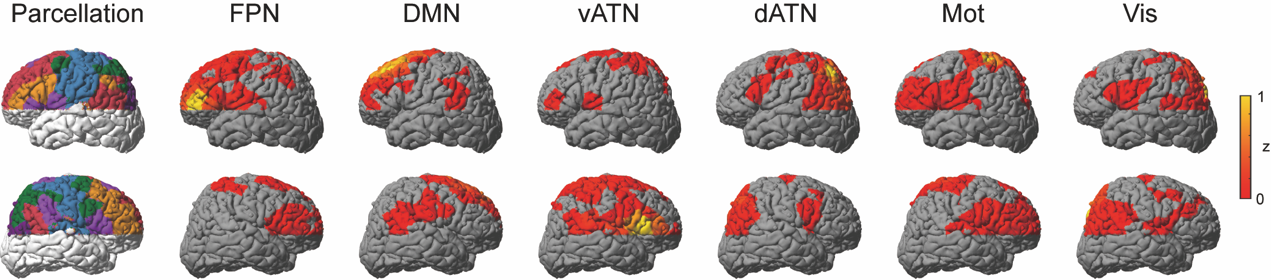


**Figure S1. Consistence between individual network parcellation and seed-based functional connectivity (FC).** Parcellations were derived from sub 01 and seed-based FC in FPN, DMN, vATN, dATN, Mot and Vis.


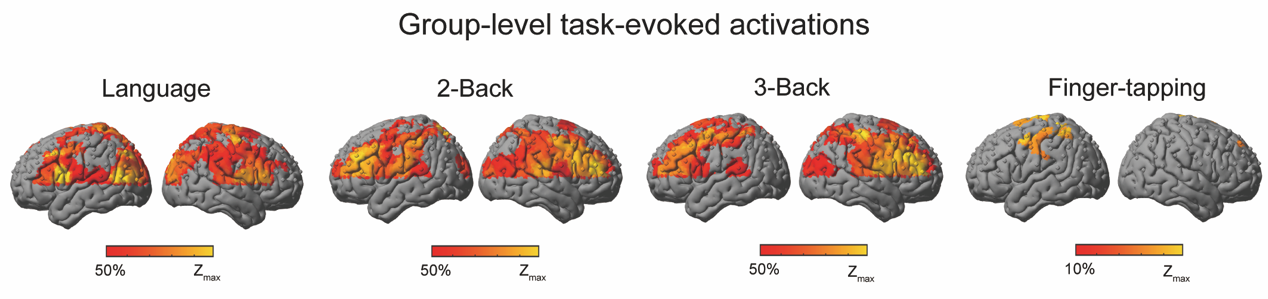


**Figure S2. Group-level activations for the language, 2-back, 3-back, and finger-tapping tasks.** Task-evoked responses were defined using the following contrasts: sentence > nonword, 2-back > 0-back, 3-back > 0-back, and right > left finger-tapping. For visualization, the top 50% most activated channels were shown for the language, 2-back and 3-back tasks, and the top 10% for the finger-tapping task.


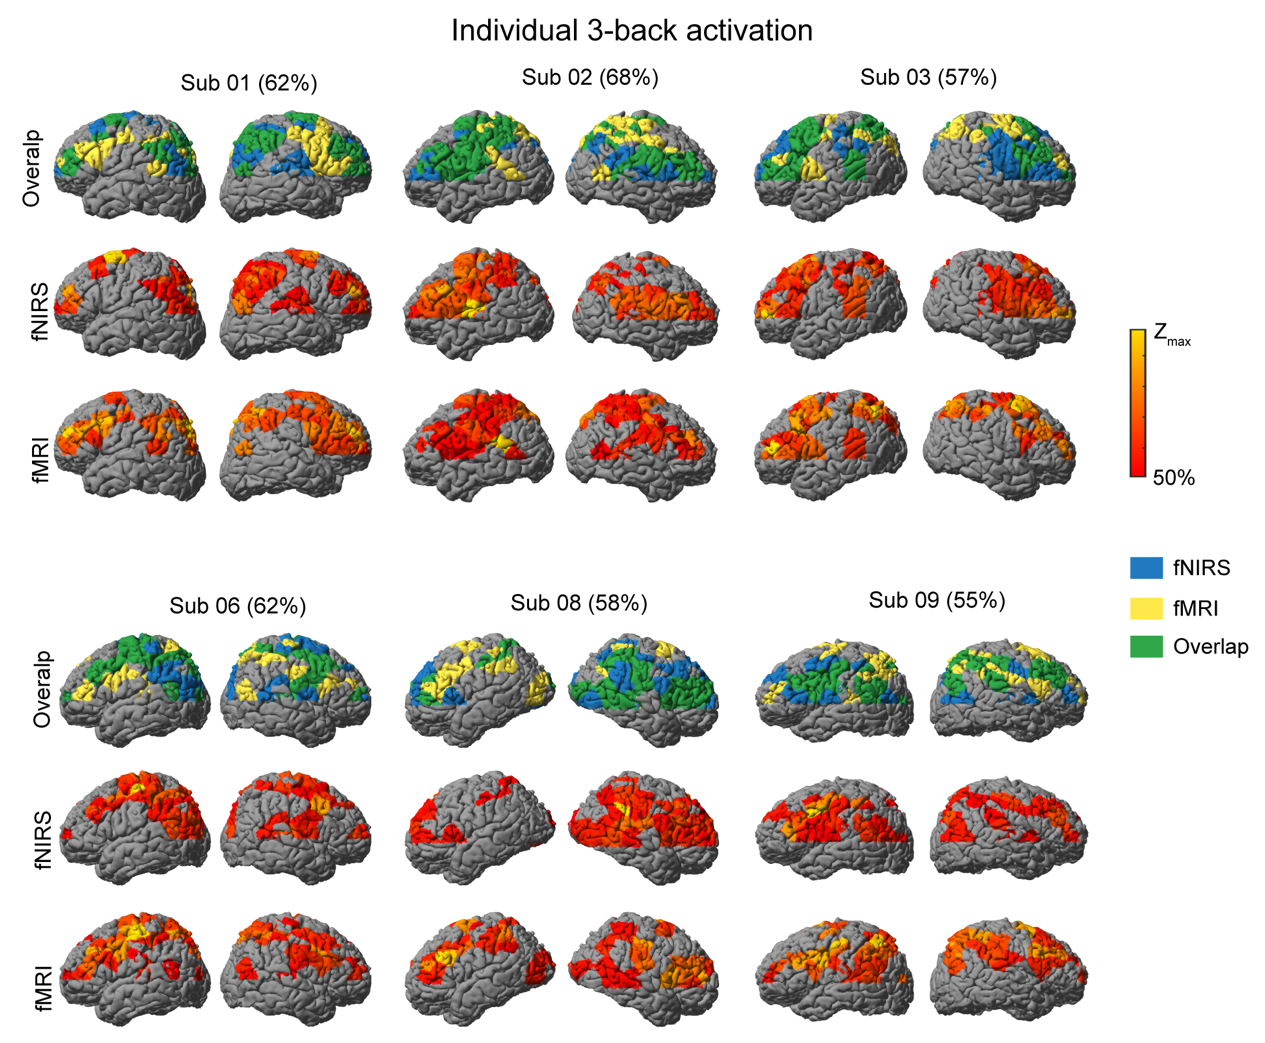


**Figure S3. Agreement between individual fNIRS- and fMRI-derived activation during the 3-back working memory task across subjects.** TPR was used to evaluate the extent to which fNIRS recovered task-evoked activations defined by fMRI (3-back > 0-back contrast), based on the top 50% of fMRI-activated channels. The average TPR across subjects was 60.3%.

**Table S1 Demographic and Behavioral Characteristics**

| Sub | Gender | Age | Handedness | Rest Sessions fNIRS/fMRI | Language Runs fNIRS/fMRI | | N-back Runs fNIRS/fMRI | | Motor Runs fNIRS/fMRI | |
| --- | --- | --- | --- | --- | --- | --- | --- | --- | --- | --- |
| 01 | M | 28 | R | 6/1 | 18/10 | 18/10 | | 18/10 | |
| 02 | F | 27 | R | 6/1 | 18/10 | 18/10 | | 18/10 | |
| 03 | F | 30 | R | 6/1 | 18/10 | 18/10 | | 18/10 | |
| 04 | F | 35 | L | 6/1 | 18/10 | 18/- | | 18/- | |
| 05 | M | 23 | L | 6/1 | 18/10 | 18/- | | 18/- | |
| 06 | F | 26 | R | 6/1 | 18/10 | 18/10 | | 18/10 | |
| 07 | M | 28 | R | 3/1 | 9/10 | -/10 | | 9/10 | |
| 08 | F | 27 | R | -/- | 9/10 | 9/10 | | 9/10 | |
| 09 | M | 31 | R | -/- | 9/10 | 9/10 | | 6/10 | |
